# Supplementary material
Source: Springer Nature journal article supplement (https://www.springermedizin.de/resource/supplementary/12889_2011_3393_MOESM1_ESM.pdf/9488842)
Supplement: MOESM1 [file 9488842]

## **Irregular migration**

Paths of migration not adhering to legal provisions of entry and residence.

## **Undocumented migrants in the European Union**

Undocumented migrants are third-country nationals\* without a valid residence permit or visa allowing them to reside in the country of destination and who, if detected, may be liable to deportation.

## **Sub-categories of undocumented migrants**

*Failed asylum seekers:* migrants who after having been refused asylum go underground to avoid deportation.

*Illegal entrants:* migrants unlawfully entering the country of destination.

*Overstayers:* migrants remaining in the country of destination after having had their residence permits revoked or after expiration of their visas.

*Undocumented migrants by birth:* persons born to undocumented migrants and who inherit their parents' irregular status.

## **South Asian migrants**

Migrants originating from countries on the Indian subcontinent, including Bangladesh, India, Nepal, Pakistan and Sri Lanka.

\*Migrants from non-EU countries and countries outside the Schengen Area.
